# Supplementary material for: Evaluation of the systemic and mucosal immune response induced by COVID-19 and the BNT162b2 mRNA vaccine for SARS-CoV-2
Source: PubMed Central journal article supplement (PMC9578597; doi:10.1371/journal.pone.0263861), 2022-10-18
Supplement: pone.0263861.s001.pdf [file pone.0263861.s001.pdf]

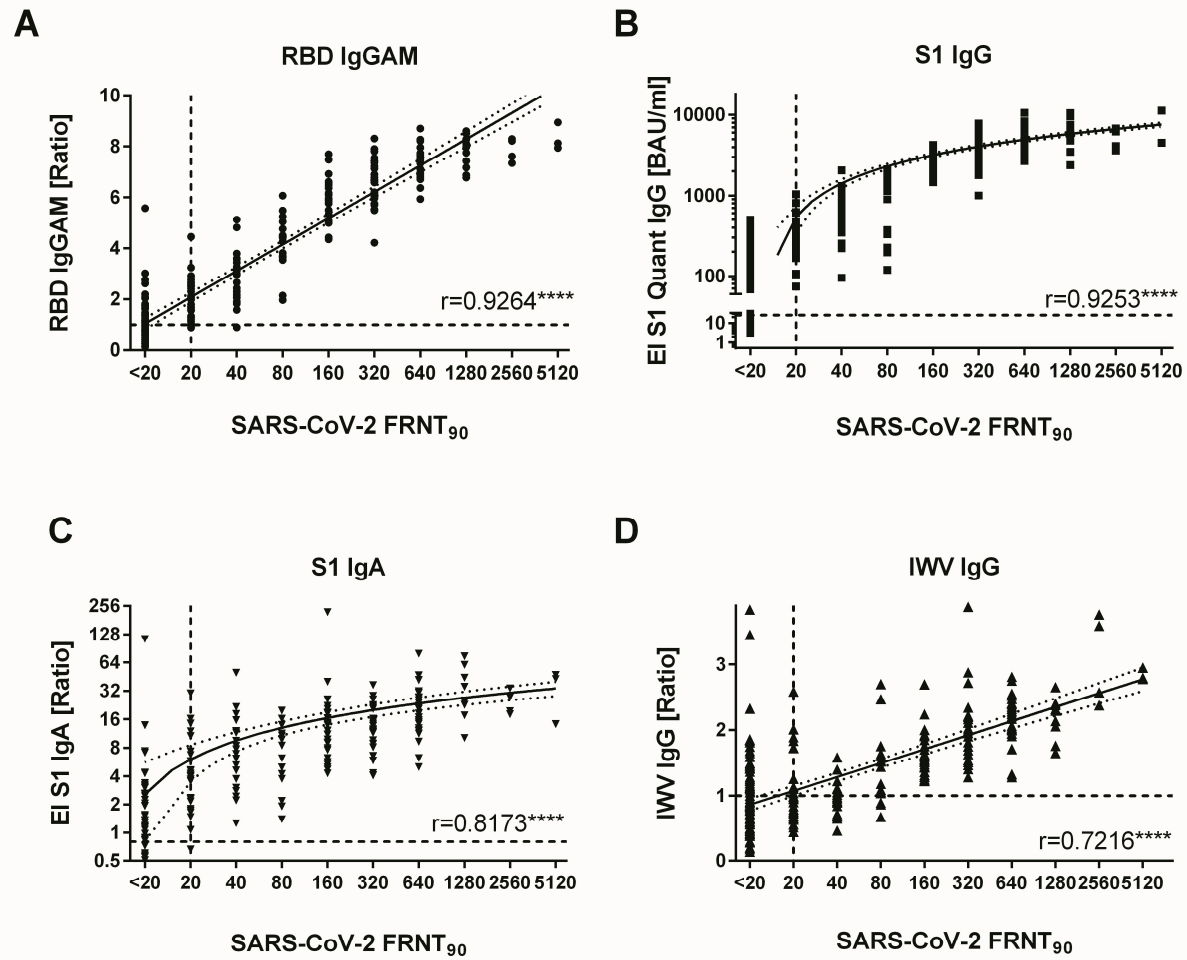

**S1 Fig:** Correlation between different BNT162b2-induced antibodies and SARS-CoV-2 virus neutralizing titers. Horizontal dotted line represents the cut-off values of the ELISAs. The vertical dotted lines show the neutralization assay cut-off. (A) RBD IgGAM as sample/calibrator ratio (B) S1 IgG antibodies were measured quantitatively [BAU/ml] (C-D) IWV IgG and S1 IgA antibodies are depicted as sample/calibrator ratios.
