# Supplementary material for: Evaluation of the systemic and mucosal immune response induced by COVID-19 and the BNT162b2 mRNA vaccine for SARS-CoV-2
Source: PubMed Central journal article supplement (PMC9578597; doi:10.1371/journal.pone.0263861), 2022-10-18
Supplement: pone.0263861.s002.pdf [file pone.0263861.s002.pdf]

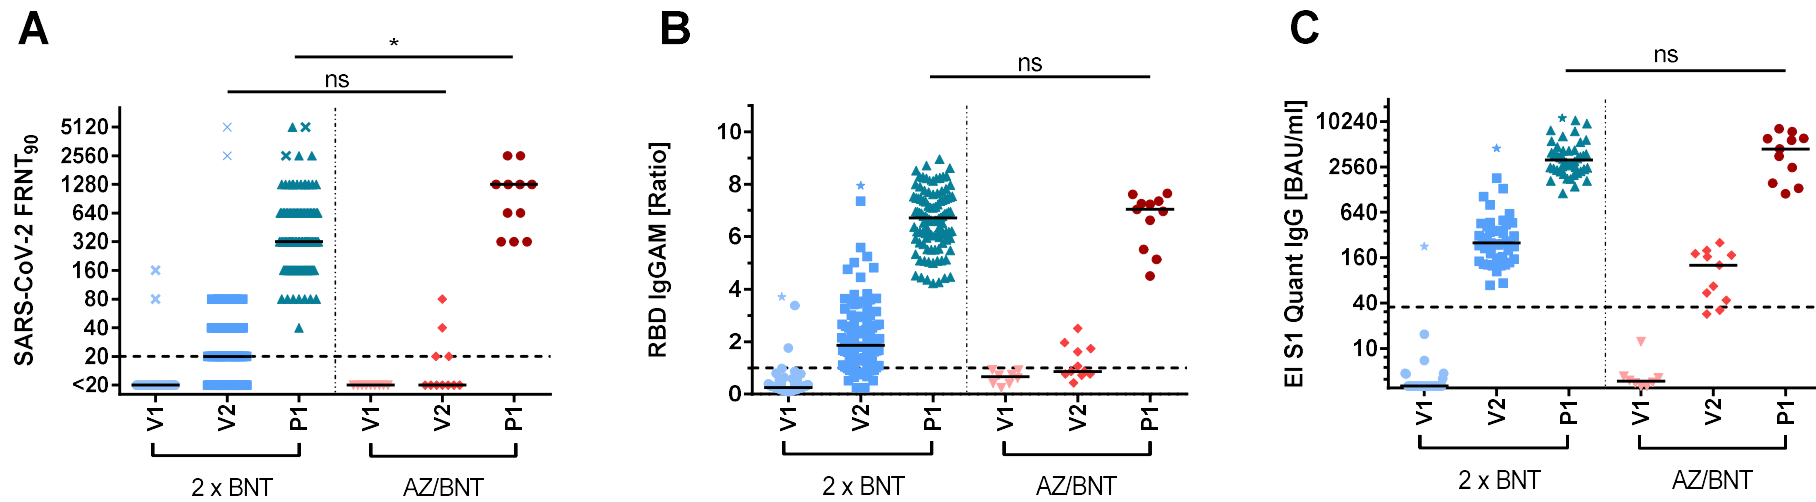

**S2 Fig:** The presented data compare antibody titers between homologous BNT162b2 (BNT) and heterologous ChAdOx1-S/BNT162b2 (AZ/BNT) vaccinated individuals at time points before first (V1), three weeks after the first (V2), and two weeks after the second vaccination (P1). (A) Titers of neutralizing antibodies (nAb) were measured in focus reduction neutralization assay with inhibitor titer 90% (FRNT90). (B) RBD IgGAM signals determined as sample/cut-off ratios (C) S1 quant IgG antibodies were quantitatively measured in binding antibody units per milliliter (BAU/ml).

The horizontal dotted lines represent the positivity cut-offs for each test. Statistical analysis was performed with ordinary 1-way ANOVA, Holm-Sidak's multiple comparison test  
 $*$  =  $p < 0.05$ ,  $**$  =  $p < 0.01$ ,  $***$  =  $p < 0.001$ ,  $****$  =  $p < 0.0001$ , ns = not significant
